# Supplementary material for: The Solid-State Synthesis of BiOIO3 Nanoplates with Boosted Photocatalytic Degradation Ability for Organic Contaminants
Source: MDPI journal article supplement (doi:10.3390/molecules28093681), 2023-04-24
Supplement: s1 [file s1]

## Supporting Information for

# The Solid-State Synthesis of BiOIO<sub>3</sub> Nanoplates with Boosted Photocatalytic Degradation Ability for Organic Contaminants

Jia Li <sup>†</sup>, Jing Xie <sup>\*,†</sup>, Xiaojing Zhang, Enhui Lu and Yali Cao <sup>\*</sup>

State Key Laboratory of Chemistry and Utilization of Carbon Based Energy Resources, College of Chemistry, Xinjiang University, Urumqi 830046, China

<sup>\*</sup> Correspondence: xiejing@xju.edu.cn (J.X.); caoyali523@163.com (Y.C.); Tel.: +86-991-8583083 (Y.C.); Fax: +86-991-8588883 (Y.C.)

<sup>†</sup> These authors contributed equally to this work.

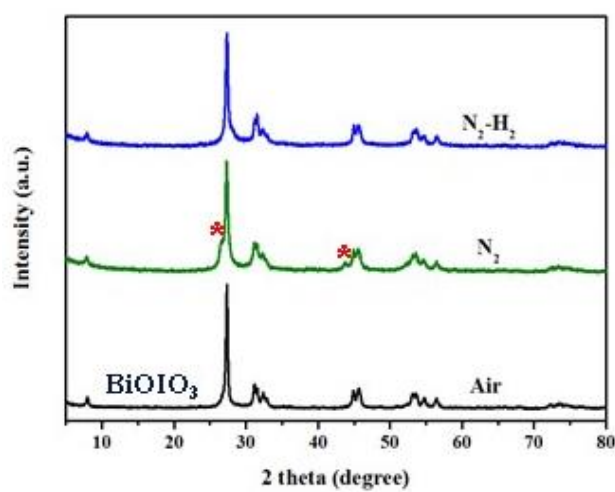

Figure S1 XRD patterns of  $BiOI_3$  synthesis with different calcination atmosphere.

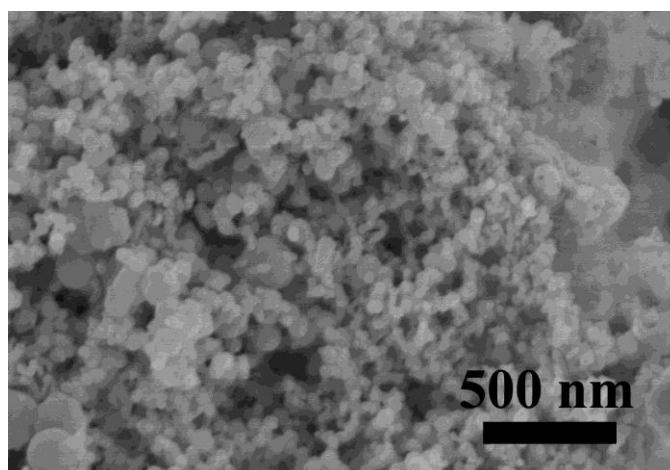

Figure S2 FESEM image of the precursor.

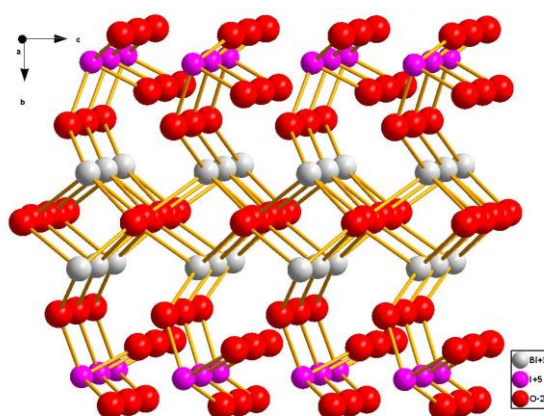

Figure S3 The crystal structure of  $BiOI_3$ .

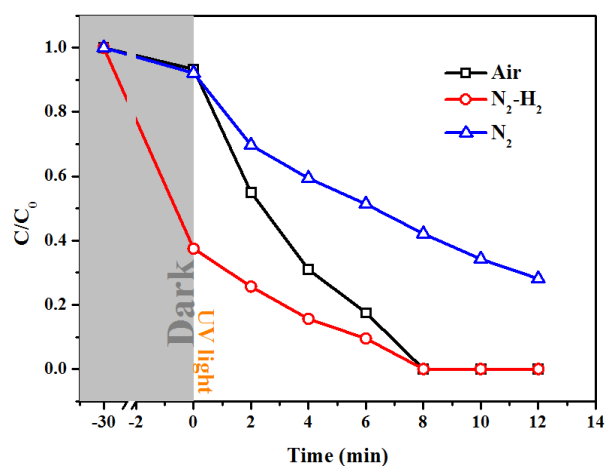

Figure S4 Degradation efficiencies of MO over BiOI/O<sub>3</sub> synthesis with different calcination atmosphere under UV light irradiation.

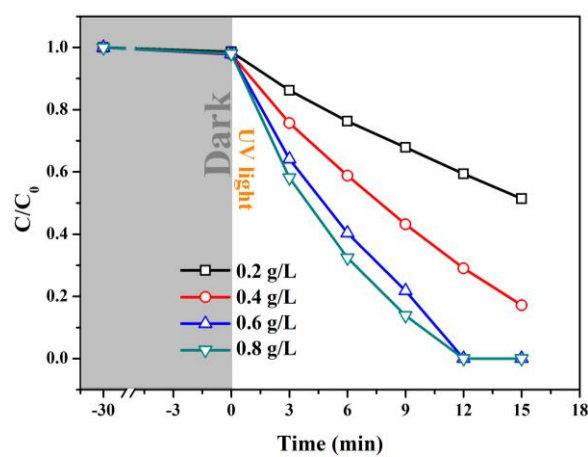

Figure S5 Degradation efficiencies of MO by different concentrations of BiOI/O<sub>3</sub>.

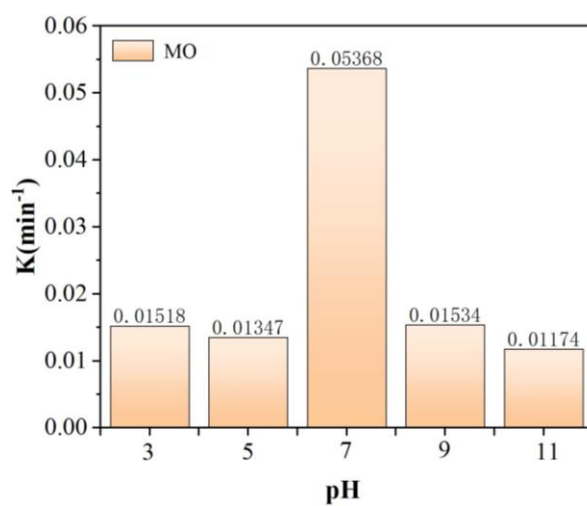

Figure S6 Degradation efficiencies of MO over BiOI/O<sub>3</sub> in different pH.

Table S1 The comparison of the degradation for MO in this study with other investigations.

| Catalyst                                            | The concentration of MO | Catalyst dosage (mg) | Irradiation time (min) | Removal rate (%) | Ref.      |
|-----------------------------------------------------|-------------------------|----------------------|------------------------|------------------|-----------|
| BiOIO <sub>3</sub>                                  | 10 mg/L                 | 25                   | 10                     | 100              | This work |
| BiOIO <sub>3</sub>                                  | 200 mg/L                | 100                  | 12                     | 92%              | [S1]      |
| 10% Co-ZnO                                          | 100 mg/L                | 50                   | 120                    | 93               | [S2]      |
| SbSI nanowires                                      | 30 mg/L                 | 25                   | 10                     | 97               | [S3]      |
| TiO <sub>2</sub> nanotubes network                  | 20 mg/L                 | -                    | 120                    | 80               | [S4]      |
| Ca <sub>0.8</sub> -β-In <sub>2</sub> S <sub>3</sub> | 10 mg/L                 | 30                   | 30                     | 98               | [S5]      |
| CuPd/ZnO                                            | 40 mg/L                 | 50                   | 45                     | 95               | [S6]      |
| porous graphene/ZnO                                 | 13 mg/L                 | -                    | 150                    | 100              | [S7]      |

[S1] Wang, W.J.; Huang, B.B.; Ma, X.C.; Wang, Z.Y.; Qin, X.Y.; Zhang, X.Y.; Dai, Y.; Whangbo, M.H. Efficient separation of photo-generated electron-hole pairs by the combination of a heterolayered structure and internal polar field in pyroelectric BiOIO<sub>3</sub> nanoplates. *Chem. Eur. J.* **2013**, *19*, 14777-14780.

[S2] Adeel, M.; Saeed, M.; Khan, I.; Muneer, M.; Akram, N. Synthesis and characterization of Co-ZnO and evaluation of its photocatalytic activity for photodegradation of methyl orange. *ACS Omega*. **2021**, *6*, 1426-1435.

[S3] Wang, R.H.; Wang, Y.N.; Zhang, N.N.; Lin, S.; He, Y.J.; Yan, Y.J.; Hu, K.; Sun, H.J.; Liu, X.F. Synergetic piezo-photocatalytic effect in SbSI for highly efficient degradation of methyl orange. *Ceram. Int.* **2022**, *48*, 31818-31826.

[S4] Yang, J.; Du, J.; Li, X.; Liu, Y.; Jiang, C.; Qi, W.; Zhang, K.; Gong, C.; Li, R.; Luo, M.; Peng, H. Highly hydrophilic TiO<sub>2</sub> nanotubes network by alkaline hydrothermal method for photocatalysis degradation of methyl orange. *Nanomaterials-Basel*. **2019**, *9*, 526-539.

[S5] Yao, W.; Chen, Y.F.; Li, J.L.; Yang, J.; Ren, S.; Liu, W.C.; Liu, Q.C. Photocatalytic degradation of methyl orange by Ca doped β-In<sub>2</sub>S<sub>3</sub> with varying Ca concentration. *Res. Chem. Intermediatr.* **2022**, *48*, 1813-1829.

[S6] Sun, H.; Lee, S.Y.; Park, S.J. Bimetallic CuPd alloy nanoparticles decorated ZnO nanosheets with enhanced photocatalytic degradation of methyl orange dye. *J. Colloid Interface Sci.* **2022**, *629*, 87-96.

[S7] Wang, L.; Li, Z.; Chen, J.; Huang, Y.; Zhang, H.; Qiu, H. Enhanced photocatalytic degradation of methyl orange by porous graphene/ZnO nanocomposite. *Environ. Pollut.* **2019**, *249*, 801-811.
